# Supplementary material for: Scale-like cantilever cell traps
Source: Royal Society of Chemistry journal article supplement (doi:10.1039/c3ra46123h), 2013-11-19
Supplement: c3ra46123h.pdf [file c3ra46123h.pdf]

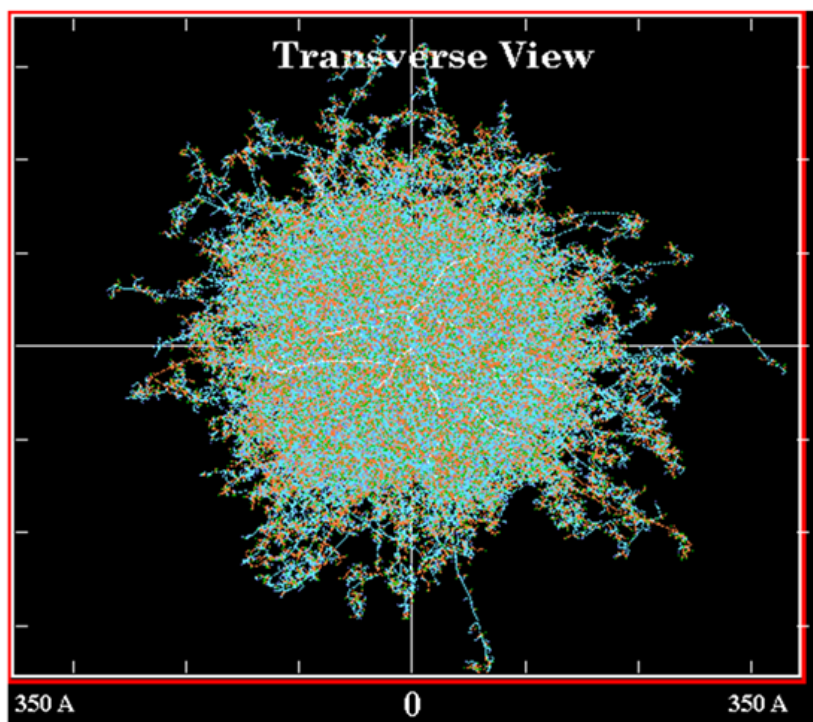

Supplementary figure 1 - SRIM simulation of 1000 Ga ion against  $\text{Si}_3\text{N}_4$  monolayer. The pattern of ion ablation is nearly circular. Due to this the ends of the cut were smooth despite the kerf size being 200nm.
